# Supplementary material
Source: PubMed Central journal article supplement (PMC4485565)
Supplement: NIHMS689527-supplement-2.pdf [file NIHMS689527-supplement-2.pdf]

| Genotypes      | <i>Trbp</i> <sup>fl/+</sup> | <i>Trbp</i> <sup>fl/fl</sup> | <i>cTNT-Cre</i> <sup>TG</sup> ; <i>Trbp</i> <sup>fl/+</sup> | <i>cTNT-Cre</i> <sup>TG</sup> ; <i>Trbp</i> <sup>fl/fl</sup> | Total |
|----------------|-----------------------------|------------------------------|-------------------------------------------------------------|--------------------------------------------------------------|-------|
| Number         | 36                          | 33                           | 30                                                          | 27                                                           | 126   |
| Percentage (%) | 28.5                        | 26.2                         | 23.8                                                        | 21.3                                                         | 100   |

( $\chi^2=1.429$ ,  $p=0.69885131$ )

**Supplementary Table 1.** Genotyping results of postnatal 0.5 (p0.5) pups from *cTNT-Cre*<sup>TG</sup>; *Trbp*<sup>fl/+</sup> and *Trbp*<sup>fl/fl</sup> intercrossing.

|                           | p2.5          |                                     | 2w            |                                     | 3w            |                                     | 1m            |                                     | 2m            |                                     |
|---------------------------|---------------|-------------------------------------|---------------|-------------------------------------|---------------|-------------------------------------|---------------|-------------------------------------|---------------|-------------------------------------|
|                           | Ctrl<br>(n=4) | <i>Trbp</i> <sup>CKO</sup><br>(n=5) | Ctrl<br>(n=5) | <i>Trbp</i> <sup>CKO</sup><br>(n=5) | Ctrl<br>(n=5) | <i>Trbp</i> <sup>CKO</sup><br>(n=3) | Ctrl<br>(n=6) | <i>Trbp</i> <sup>CKO</sup><br>(n=5) | Ctrl<br>(n=6) | <i>Trbp</i> <sup>CKO</sup><br>(n=4) |
| Heart Rate(BPM)           | 372±37        | 371±53                              | 634±33        | 572 ±44*                            | 631±74        | 562±22                              | 615±32        | 556±42*                             | 623±45        | 595±74                              |
| IVS;d (mm)                | 0.241±0.031   | 0.274±0.052                         | 0.301±0.063   | 0.285±0.0519                        | 0.370±0.055   | 0.371±0.050                         | 0.393±0.040   | 0.445±0.024*                        | 0.546±0.156   | 0.510±0.085                         |
| IVS;s (mm)                | 0.282±0.056   | 0.290±0.058                         | 0.379±0.023   | 0.383±0.067                         | 0.467±0.137   | 0.492±0.056                         | 0.501±0.055   | 0.478±0.106                         | 0.581±0.127   | 0.597±0.101                         |
| LVID;d (mm)               | 1.314±0.161   | 1.331±0.086                         | 2.542±0.232   | 2.440±0.223                         | 2.549±0.345   | 2.763±0.284                         | 3.273±0.376   | 3.606±0.278                         | 3.193±0.357   | 4.118±0.517**                       |
| LVID;s (mm)               | 0.389±0.034   | 0.408±0.069                         | 0.933±0.161   | 1.165±0.128*                        | 1.079±0.165   | 1.780±0.179**                       | 1.431±0.323   | 2.796±0.261**                       | 1.409±0.344   | 3.246±0.609**                       |
| LVPW;d (mm)               | 0.322±0.022   | 0.333±0.052                         | 0.375±0.065   | 0.391±0.077                         | 0.483±0.102   | 0.447±0.031                         | 0.514±0.073   | 0.504±0.125                         | 0.617±0.048   | 0.543±0.104                         |
| LVPW;s (mm)               | 0.322±0.038   | 0.349±0.038                         | 0.725±0.16    | 0.583±0.067                         | 0.622±0.198   | 0.528±0.015                         | 0.814±0.065   | 0.590±0.095**                       | 0.800±0.172   | 0.617±0.130                         |
| EF (%)                    | 96.51±0.38    | 95.97±1.75                          | 92.55±2.23    | 84.90±3.62**                        | 88.31±5.23    | 66.94±2.37**                        | 87.25±5.19    | 45.76±8.07**                        | 87.00±7.65    | 43.69±6.45**                        |
| FS (%)                    | 70.30±1.39    | 69.33±4.90                          | 63.40±4.27    | 52.20±4.13**                        | 57.19±7.71    | 35.57±1.85**                        | 56.61±7.45    | 22.42±4.87**                        | 56.25±7.65    | 21.54±6.45**                        |
| LV Mass (mg)              | 4.67±1.28     | 5.19±0.94                           | 18.30±5.88    | 17.09±5.82                          | 25.18±10.81   | 26.10±3.13                          | 40.27±7.95    | 50.29±8.79                          | 54.84±21.35   | 72.25±15.94                         |
| LV Mass<br>(Corrected mg) | 3.73±1.02     | 4.15±0.75                           | 14.64±4.70    | 13.67±4.65                          | 20.15±8.65    | 20.88±2.50                          | 32.22±6.36    | 40.23±7.03                          | 43.87±17.08   | 57.80±12.75                         |
| LV Vol;d (uL)             | 4.38±1.37     | 4.45±0.71                           | 23.54±5.37    | 21.26±4.63                          | 24.01±7.62    | 28.95±7.50                          | 44.03±11.76   | 55.05±10.24                         | 41.42±11.08   | 76.34±21.99**                       |
| LV Vol;s (uL)             | 0.15±0.04     | 0.18±0.09                           | 1.80±0.84     | 3.17±0.86*                          | 2.63±1.05     | 9.56±2.54                           | 5.80±2.65     | 29.78±7.26**                        | 5.65±3.29     | 44.21±19.42**                       |

**Supplementary Table 2.** Echocardiography analyses of cardiac function of *Trbp*<sup>CKO</sup> mice and their control littermates (Ctrl) at different timepoints. P2.5: postnatal day 2.5; 2w: 2 weeks after birth; 3w: 3 weeks after birth; 1m: 1 month after birth; 2m: 2 months after birth; \*: P(Ctrl VS. *Trbp*<sup>CKO</sup>) <0.05, \*\*: P(Ctrl VS. *Trbp*<sup>CKO</sup>) <0.01.

|                           | Ctrl/AAV-Luc<br>(n=14) | <i>Trbp</i> <sup>CKO</sup> /AAV-Luc<br>(n=6) | Ctrl/AAV-Trbp<br>(n=5) | <i>Trbp</i> <sup>CKO</sup> /AAV-Trbp<br>(n=8) | Ctrl/AAV-Hopx<br>(n=14) | <i>Trbp</i> <sup>CKO</sup> /AAV-Hopx<br>(n=17) |
|---------------------------|------------------------|----------------------------------------------|------------------------|-----------------------------------------------|-------------------------|------------------------------------------------|
| Heart Rate (BPM)          | 657±43                 | 511±57**                                     | 597±38                 | 556±34                                        | 664±36                  | 503±92                                         |
| IVS;d (mm)                | 0.588±0.83             | 0.505±0.114                                  | 0.479±0.120            | 0.470±0.096                                   | 0.611±0.111             | 0.562±0.130                                    |
| IVS;s (mm)                | 0.832±0.144            | 0.581±0.095**                                | 0.672±0.041            | 0.684±0.124                                   | 0.876±0.198             | 0.630±0.174                                    |
| LVID;d (mm)               | 3.160±0.252            | 3.524±0.313*                                 | 2.790±0.597            | 2.663±0.405 <sup>##</sup>                     | 3.331±0.307             | 3.415±0.272                                    |
| LVID;s (mm)               | 1.311±0.214            | 2.737±0.306**                                | 1.248±0.415            | 1.221±0.203 <sup>##</sup>                     | 1.493±0.270             | 2.448±0.303                                    |
| LVPW;d (mm)               | 0.627±0.065            | 0.554±0.117                                  | 0.520±0.041            | 0.503±0.112                                   | 0.627±0.097             | 0.554±0.078                                    |
| LVPW;s (mm)               | 0.935±0.097            | 0.657±0.117**                                | 0.754±0.166            | 0.734±0.082                                   | 0.964±0.106             | 0.701±0.102                                    |
| EF (%)                    | 89.06±3.81             | 44.95±13.41**                                | 86.93±5.78             | 86.32±3.24 <sup>##</sup>                      | 86.65±4.00              | 55.25±10.37                                    |
| FS (%)                    | 58.61±5.05             | 22.16±7.60**                                 | 55.76±8.19             | 54.13±4.12 <sup>##</sup>                      | 55.45±4.80              | 28.34±6.59                                     |
| LV Mass (mg)              | 55.10±8.28             | 56.26±17.68                                  | 36.62±18.64            | 32.12±14.01 <sup>#</sup>                      | 61.71±11.53             | 56.37±12.56                                    |
| LV Mass<br>(Corrected mg) | 44.08±6.62             | 45.01±14.14                                  | 29.30±14.91            | 25.69±11.22 <sup>#</sup>                      | 49.37±9.22              | 45.10±10.5                                     |
| LV Vol;d (uL)             | 40.11±7.83             | 52.23±10.83*                                 | 31.09±14.30            | 27.00±10.48 <sup>##</sup>                     | 45.70±9.81              | 48.40±9.33                                     |
| LV Vol;s (uL)             | 4.47±2.05              | 28.42±8.15**                                 | 4.43±3.66              | 3.70±1.53 <sup>##</sup>                       | 6.35±2.99               | 21.71±6.71                                     |

**Supplementary Table 3.** Echocardiography analyses of cardiac function of 1-month old *Trbp*<sup>CKO</sup> mice and their control littermates (Ctrl) injected with AAV-Luciferase(AAV-Luc), AAV-Trbp, or AAV-Hopx. \*: P (Ctrl/AAV-Luc VS. *Trbp*<sup>CKO</sup>/AAV-Luc) <0.05; \*\*: P (Ctrl/AAV-Luc VS. *Trbp*<sup>CKO</sup>/AAV-Luc) <0.01; #: P(*Trbp*<sup>CKO</sup>/AAV-Luc VS. *Trbp*<sup>CKO</sup>/AAV-Trbp) <0.05; ##: P(*Trbp*<sup>CKO</sup>/AAV-Luc VS. *Trbp*<sup>CKO</sup>/AAV-Trbp) <0.01; &.:P(*Trbp*<sup>CKO</sup>/AAV-Luc VS. *Trbp*<sup>CKO</sup>/AAV-Hopx) <0.05; &&.: P(*Trbp*<sup>CKO</sup>/AAV-Luc VS. *Trbp*<sup>CKO</sup>/AAV-Hopx) <0.01.

|                           | Ctrl/AAV-Scramble<br>(n=8) | <i>Trbp</i> <sup>ckO</sup> /AAV-Scramble<br>(n=9) | Ctrl/AAV-Sox6 shRNA<br>(n=6) | <i>Trbp</i> <sup>ckO</sup> /AAV-Sox6 shRNA<br>(n=12) |
|---------------------------|----------------------------|---------------------------------------------------|------------------------------|------------------------------------------------------|
| Heart Rate (BPM)          | 633±58                     | 574±27*                                           | 648±41                       | 607±34 <sup>#</sup>                                  |
| IVS;d (mm)                | 0.449±0.055                | 0.391±0.069                                       | 0.456±0.056                  | 0.413±0.065                                          |
| IVS;s (mm)                | 0.563±0.061                | 0.477±0.105                                       | 0.617±0.045                  | 0.546±0.065                                          |
| LVID;d (mm)               | 2.854±0.309                | 3.670±0.403**                                     | 3.148±0.184                  | 2.882±0.250 <sup>##</sup>                            |
| LVID;s (mm)               | 1.248±0.237                | 2.760±0.578**                                     | 1.377±0.234                  | 1.419±0.275 <sup>##</sup>                            |
| LVPW;d (mm)               | 0.490±0.049                | 0.462±0.063                                       | 0.514±0.234                  | 0.478±0.046                                          |
| LVPW;s (mm)               | 0.708±0.102                | 0.486±0.054**                                     | 0.702±0.052                  | 0.664±0.094 <sup>##</sup>                            |
| EF (%)                    | 87.82±3.69                 | 49.65±16.10**                                     | 87.30±4.57                   | 82.86±6.91 <sup>##</sup>                             |
| FS (%)                    | 56.47±4.91                 | 25.34±9.70**                                      | 56.33±6.50                   | 50.89±7.68 <sup>##</sup>                             |
| LV Mass (mg)              | 33.24±7.19                 | 45.88±11.17*                                      | 40.59±3.17*                  | 31.63±5.81 <sup>##</sup>                             |
| LV Mass<br>(Corrected mg) | 26.59±5.75                 | 36.70±8.94*                                       | 32.47±2.53*                  | 25.30±4.65 <sup>##</sup>                             |
| LV Vol;d (uL)             | 31.50±8.85                 | 57.94±16.01**                                     | 39.54±5.61                   | 32.08±6.59 <sup>##</sup>                             |
| LV Vol;s (uL)             | 3.98±2.15                  | 30.40±14.85**                                     | 5.08±2.01                    | 5.61±2.72 <sup>##</sup>                              |

**Supplementary Table 4.** Echocardiography analyses of cardiac function of 1-month old *Trbp*<sup>ckO</sup> mice and their control littermates (Ctrl) injected with AAV-Scramble or AAV-Sox6 shRNA. \*: P (Ctrl/AAV-Scramble VS. *Trbp*<sup>ckO</sup>/AAV-Scramble) <0.05; \*\*: P (Ctrl/AAV-Scramble VS. *Trbp*<sup>ckO</sup>/AAV-Scramble)<0.01; #: P(*Trbp*<sup>ckO</sup>/AAV-Scramble VS. *Trbp*<sup>ckO</sup>/AAV-Sox6 shRNA) <0.05; ##: P(*Trbp*<sup>ckO</sup>/AAV-Scramble VS. *Trbp*<sup>ckO</sup>/AAV-Sox6 shRNA) <0.01.

|                           | AAV-Luc<br>(n=6) | AAV-Sox6<br>(n=7) |
|---------------------------|------------------|-------------------|
| Heart Rate (BPM)          | 672±46           | 570±47**          |
| IVS;d (mm)                | 0.474±0.047      | 0.452±0.061       |
| IVS;s (mm)                | 0.567±0.104      | 0.433±0.065*      |
| LVID;d (mm)               | 3.054±0.328      | 4.124±0.164**     |
| LVID;s (mm)               | 1.386±0.177      | 3.457±0.322**     |
| LVPW;d (mm)               | 0.537±0.088      | 0.437±0.055*      |
| LVPW;s (mm)               | 0.684±0.063      | 0.502±0.048**     |
| EF (%)                    | 86.45±2.41       | 34.10±11.23**     |
| FS (%)                    | 54.63±3.08       | 16.25±5.97**      |
| LV Mass (mg)              | 41.48±11.76      | 58.89±6.30**      |
| LV Mass<br>(Corrected mg) | 33.18±9.41       | 47.11±5.04**      |
| LV Vol;d (uL)             | 37.14±9.55       | 75.41±7.15**      |
| LV Vol;s (uL)             | 5.06±1.56        | 49.96±10.80**     |

**Supplementary Table 5.** Echocardiography analyses of cardiac function of 1-month old wild type mice injected with AAV-Luciferase (AAV-Luc) or AAV-Sox6. \*: P (AAV-Luc VS. AAV- Sox6) <0.05; \*\*: P (AAV-Luc VS. AAV- Sox6)<0.01.

|                           | Ctrl<br>(n=7) | <i>Trbp</i> <sup>CKO</sup><br>(n=8) | <i>miR-208a</i> <sup>TG</sup><br>(n=9) | <i>Trbp</i> <sup>CKO</sup> ; <i>miR-208a</i> <sup>TG</sup><br>(n=7) |
|---------------------------|---------------|-------------------------------------|----------------------------------------|---------------------------------------------------------------------|
| Heart Rate (BMP)          | 597±40        | 560±58                              | 619±45                                 | 551±41                                                              |
| IVS;d (mm)                | 0.494±0.051   | 0.486±0.121                         | 0.525±0.124                            | 0.471±0.058                                                         |
| IVS;s (mm)                | 0.698±0.126   | 0.563±0.072*                        | 0.754±0.091                            | 0.652±0.144                                                         |
| LVID;d (mm)               | 3.223±0.330   | 3.287±0.264                         | 3.392±0.243                            | 3.200±0.346                                                         |
| LVID;s (mm)               | 1.568±0.485   | 2.401±0.374**                       | 1.747±0.229                            | 1.564±0.303###                                                      |
| LVPW;d (mm)               | 0.567±0.100   | 0.516±0.083                         | 0.584±0.057                            | 0.521±0.074                                                         |
| LVPW;s (mm)               | 0.755±0.125   | 0.617±0.095*                        | 0.766±0.050                            | 0.751±0.088#                                                        |
| EF (%)                    | 83.05±9.44    | 53.57±11.71**                       | 80.78±4.44                             | 83.01±6.21###                                                       |
| FS (%)                    | 52.12±10.39   | 27.19±7.04**                        | 48.61±4.47                             | 51.18±6.93###                                                       |
| LV Mass (mg)              | 47.81±8.81    | 45.90±7.49                          | 55.31±11.73                            | 43.26±7.02                                                          |
| LV Mass<br>(Corrected mg) | 38.25±7.05    | 36.72±6.00                          | 44.25±9.38                             | 34.61±5.61                                                          |
| LV Vol;d (uL)             | 42.29±10.51   | 44.10±8.47                          | 47.52±8.05                             | 41.63±10.22                                                         |
| LV Vol;s (uL)             | 7.91±5.99     | 20.94±8.31**                        | 9.26±3.04                              | 7.19±3.82###                                                        |

**Supplementary Table 6.** Echocardiography analyses of cardiac function of 1-month old *Trbp*<sup>CKO</sup> mice, *miR-208a* transgenic(*miR-208a*<sup>TG</sup>) mice, *Trbp*<sup>CKO</sup>; *miR-208a*<sup>TG</sup> and their control littermates (Ctrl). \*: P (Ctrl VS. *Trbp*<sup>CKO</sup>) <0.05; \*\*: P (Ctrl VS. *Trbp*<sup>CKO</sup>)<0.01; #: P(*Trbp*<sup>CKO</sup> VS. *Trbp*<sup>CKO</sup>; *miR-208a*<sup>TG</sup>) <0.05; ###: P(*Trbp*<sup>CKO</sup> VS. *Trbp*<sup>CKO</sup>; *miR-208a*<sup>TG</sup>) <0.01.

| <b>Oligos</b>         | <b>Sequences (5'→3')</b>                         |
|-----------------------|--------------------------------------------------|
| Trbp-qF               | aggaggggaatgagtgaagagg                           |
| Trbp-qR               | gaaggctgatcgggtct                                |
| Anf-qF                | cacagatctgatggattcaaga                           |
| Anf-qR                | cctcatctctaccggcatc                              |
| Hopx-qF               | agacaggcaccagcatcc                               |
| Hopx-qR               | ccaggatctccacctggtc                              |
| Sox6-qF               | ttacaaccacagacagattgagc                          |
| Sox6-qR               | tgctgtggagtgtatgg                                |
| Cdca8-qF              | ccgacagacagaccctcct                              |
| Cdca8-qR              | agggcctgctgtttcct                                |
| Ckap2l-qF             | agaaactgtcgccgtagagc                             |
| Ckap2l-qR             | ttggggctcttagctttcc                              |
| Cenp-f-qF             | ttgaggtagcacgacttcagtt                           |
| Cenp-f-qR             | ttttggcaccgaacaacac                              |
| Cenp-p-qF             | gcagaatgtgcaaaacg                                |
| Cenp-p-qR             | caaagattcccactcctcaga                            |
| Myh6-qF               | gtgctcagagctcaagaagga                            |
| Myh6-qR               | ttgatgcttttcttttcc                               |
| Myh7-qF               | ctcagagctcaagcgggata                             |
| Myh7-qR               | ccagccatctcctctgtca                              |
| Myh7b-qF              | gcacggagctcaagaaagac                             |
| Myh7b-qR              | gccatctctctgtcaggttct                            |
| Tnni2-qF              | gagatgaggagaagcgcaac                             |
| Tnni2-qR              | cgctatctggagcatcacac                             |
| Tpm2-qF               | cgagggtggctgagagtaaag                            |
| Tpm2-qR               | tccagggattcaagttgtg                              |
| Myl1-qF               | caatggctgcatcaactatga                            |
| Myl1-qR               | gccatagggtgtcttgaactgg                           |
| Myl7-qF               | ccggaggaagagctggac                               |
| Myl7-qR               | aggcactcaggatggcttc                              |
| Myl9-qF               | gataaggaggacctgcacga                             |
| Myl9-qR               | gccctccagatactcgctctg                            |
| Tnnc1-qF              | cgacagcaaaggggaagtctg                            |
| Tnnc1-qR              | tgtagccatcagcgtttttg                             |
| Myl3-qF               | aagaaggatgatgccaaagc                             |
| Myl3-qR               | gctcaggctctggtgcag                               |
| pre-miR-208a-qF       | gagctttggccgggttatac                             |
| pre-miR-208a-qR       | acaagcttttctctgctcta                             |
| 18sr-qF               | gcaattattcccatgaacg                              |
| 18sr-qR               | gggacttaataacgcaagc                              |
| Scramble shRNA        | cctaaggtaagtcgccctcgctcgagcgagggcgacttaaccttagg  |
| Sox6 shRNA-1          | cctatattcctccgaaatacctcgaggtatttcggaaggaatatagg  |
| Sox6 shRNA-2          | tgatcccaaatacagactatagctcgagctatagctgatttgggatca |
| miR-208a-3p antisense | acaagcttttctctgctctat                            |
| miR-208a-5p antisense | gtataaccggggccaaaagctc                           |
| miR-378a-3p antisense | ccttctgactccaagtccagt                            |
| miR-378a-5p antisense | acacaggacctggagtcaggag                           |
| miR-1a-3p antisense   | atacatactctttacattcca                            |
| U6 antisense          | aaaatatggaacgcttcacgaatttgcg                     |

**Supplementary Table 7. Sequences of oligos used in the study**
